# Supplementary material for: Pseudo-base formation in the attempted synthesis of a conjugatively coupled bis(nitrosylruthenium) complex and spectroelectrochemistry of bipyrimidine-bridged dinuclear Ru(terpy)X precursor compounds (X = Cl, NO2)
Source: Royal Society of Chemistry journal article supplement (doi:10.1039/b716307j), 2007-12-18
Supplement: b716307j.pdf [file b716307j.pdf]

## **Electronic supplementary information**

**Pseudo-base formation in the attempted synthesis of a conjugatively coupled bis(nitrosylruthenium) complex and spectroelectrochemistry of bipyrimidine-bridged dinuclear Ru(terpy)X precursor compounds (X = Cl, NO<sub>2</sub>)**

**Priti Singh, Monika Sieger, Jan Fiedler, Cheng-Yong Su and Wolfgang Kaim\***

**Table S1.** Structure parameters (bond lengths in Å, bond angles in deg) of complex  $\{(\mu\text{-bpym-(4-OH)})[\text{Ru}(\text{NO})(\text{terpy})]_2\}(\text{PF}_6)_5 \cdot 2.5\text{H}_2\text{O}$ .

---

|             |          |
|-------------|----------|
| Ru(1)-N(11) | 1.784(5) |
| Ru(1)-N(9)  | 1.993(5) |
| Ru(1)-N(4)  | 2.066(5) |
| Ru(1)-N(10) | 2.085(6) |
| Ru(1)-N(8)  | 2.088(6) |
| Ru(1)-N(3)  | 2.121(5) |
| Ru(2)-N(12) | 1.796(5) |
| Ru(2)-N(6)  | 1.990(5) |
| Ru(2)-N(2)  | 2.068(5) |
| Ru(2)-N(7)  | 2.069(6) |
| Ru(2)-N(5)  | 2.092(6) |
| Ru(2)-N(1)  | 2.133(5) |
| N(1)-C(4)   | 1.331(8) |
| N(1)-C(1)   | 1.337(8) |
| N(2)-C(5)   | 1.315(8) |
| N(2)-C(8)   | 1.471(8) |
| N(3)-C(3)   | 1.334(8) |
| N(3)-C(4)   | 1.338(8) |
| N(4)-C(5)   | 1.343(8) |
| N(4)-C(6)   | 1.410(8) |
| N(5)-C(9)   | 1.319(9) |
| N(11)-O(1)  | 1.121(7) |
| N(12)-O(2)  | 1.101(6) |

|                   |           |
|-------------------|-----------|
| C(1)-C(2)         | 1.373(10) |
| C(2)-C(3)         | 1.388(10) |
| C(4)-C(5)         | 1.452(9)  |
| C(6)-C(7)         | 1.293(9)  |
| C(7)-C(8)         | 1.474(9)  |
| C(8)-O(3)         | 1.407(9)  |
| O(1)-N(11)-Ru(1)  | 174.1(5)  |
| O(2)-N(12)-Ru(2)  | 172.3(5)  |
| O(3)-C(8)-N(2)    | 109.1(6)  |
| N(11)-Ru(1)-N(9)  | 95.5(2)   |
| N(11)-Ru(1)-N(4)  | 169.8(2)  |
| N(9)-Ru(1)-N(4)   | 91.2(2)   |
| N(11)-Ru(1)-N(10) | 91.6(2)   |
| N(9)-Ru(1)-N(10)  | 79.7(2)   |
| N(4)-Ru(1)-N(10)  | 81.9(2)   |
| N(11)-Ru(1)-N(8)  | 96.0(2)   |
| N(9)-Ru(1)-N(8)   | 80.0(2)   |
| N(4)-Ru(1)-N(8)   | 92.7(2)   |
| N(10)-Ru(1)-N(8)  | 158.9(2)  |
| N(11)-Ru(1)-N(3)  | 94.9(2)   |
| N(9)-Ru(1)-N(3)   | 169.6(2)  |
| N(4)-Ru(1)-N(3)   | 78.5(2)   |
| N(10)-Ru(1)-N(3)  | 100.2(2)  |
| N(8)-Ru(1)-N(3)   | 98.7(2)   |

|                  |          |
|------------------|----------|
| N(12)-Ru(2)-N(6) | 98.0(2)  |
| N(12)-Ru(2)-N(2) | 171.1(2) |
| N(6)-Ru(2)-N(2)  | 89.9(2)  |
| N(12)-Ru(2)-N(7) | 93.9(2)  |
| N(6)-Ru(2)-N(7)  | 79.6(2)  |
| N(2)-Ru(2)-N(7)  | 91.3(2)  |
| N(12)-Ru(2)-N(5) | 91.8(2)  |
| N(6)-Ru(2)-N(5)  | 79.9(2)  |
| N(2)-Ru(2)-N(5)  | 85.7(2)  |
| N(7)-Ru(2)-N(5)  | 159.3(2) |
| N(12)-Ru(2)-N(1) | 93.3(2)  |
| N(6)-Ru(2)-N(1)  | 168.7(2) |
| N(7)-Ru(2)-N(1)  | 100.6(2) |
| N(5)-Ru(2)-N(1)  | 98.9(2)  |
| N(2)-Ru(2)-N(1)  | 78.8 (2) |

---
